# Supplementary material
Source: PubMed Central journal article supplement (PMC2785999)
Supplement: pp.109.146100_1.pdf [file pp.109.146100_1.pdf]

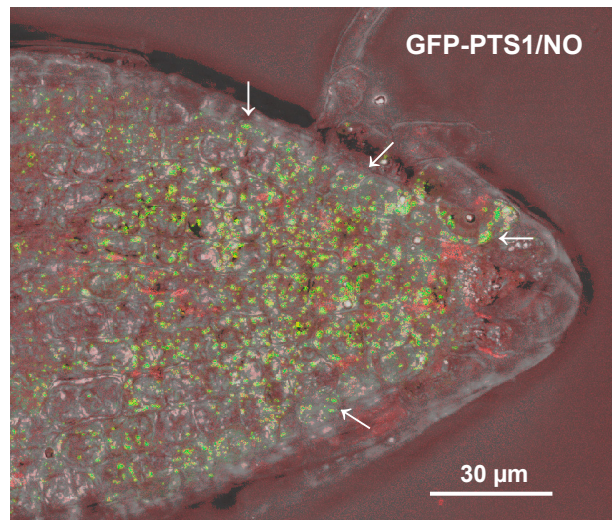

**Supplemental Figure 1. Image showing overlap between panel D of figure 3 with the corresponding bright-field image of the Arabidopsis root tip. Green fluorescence punctuates are attributable to GFP-PTS1 indicating the localization of peroxisomes, red fluorescence is attributable to NO detection, and yellow fluorescence punctuates show the co-localization of NO in peroxisomes in the same root area.**
