# Supplementary material
Source: PubMed Central journal article supplement (PMC2785999)
Supplement: pp.109.146100_2.pdf [file pp.109.146100_2.pdf]

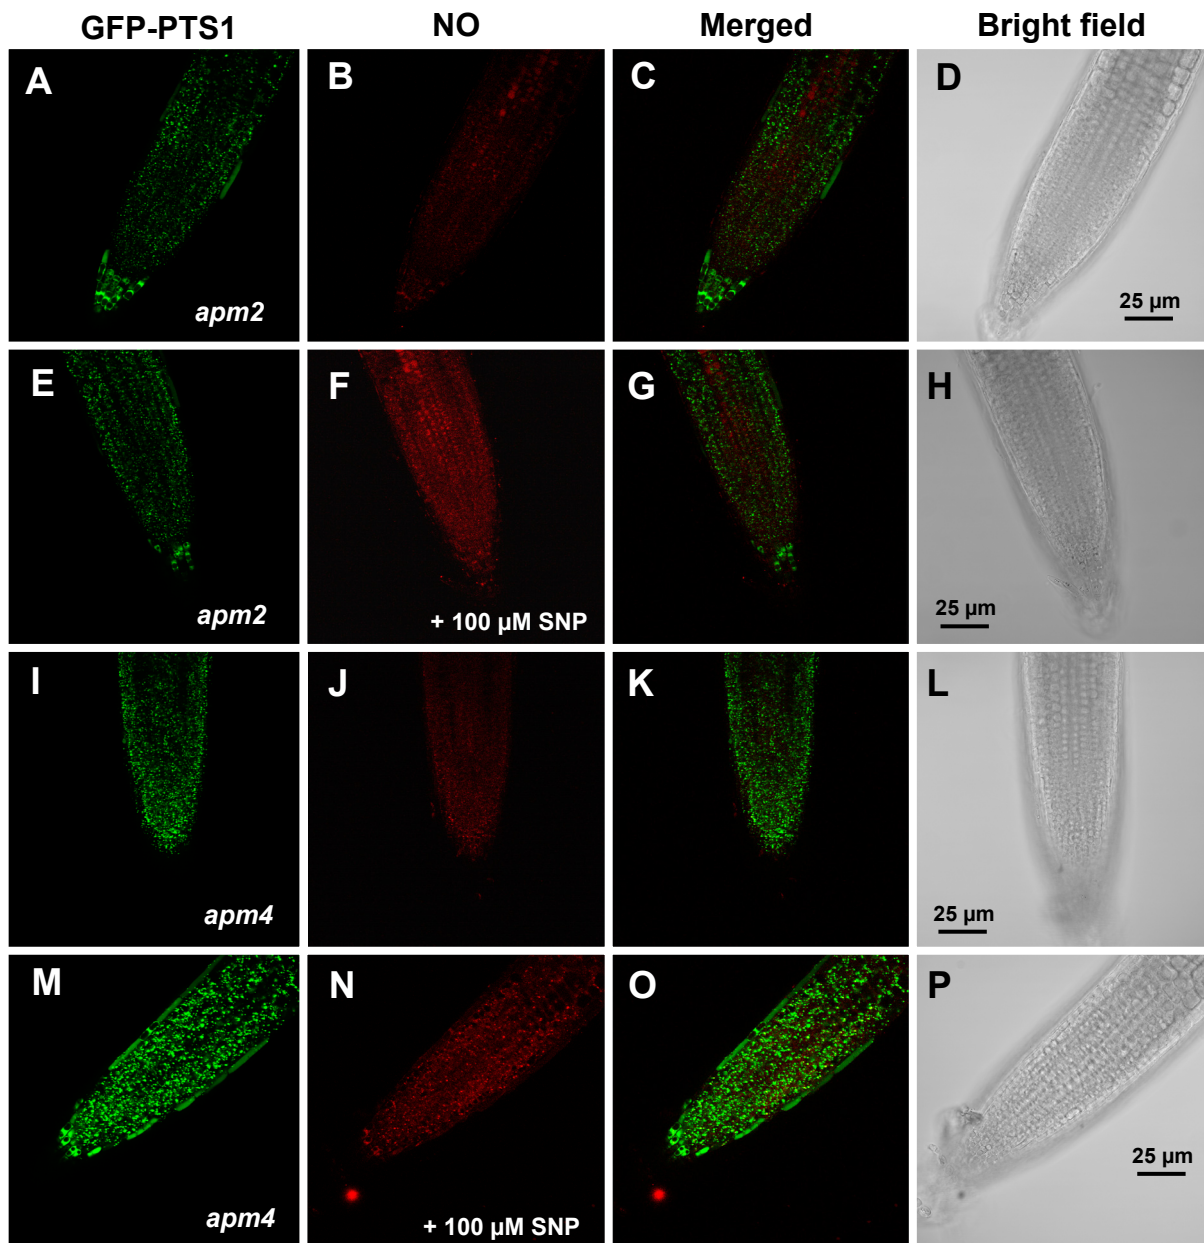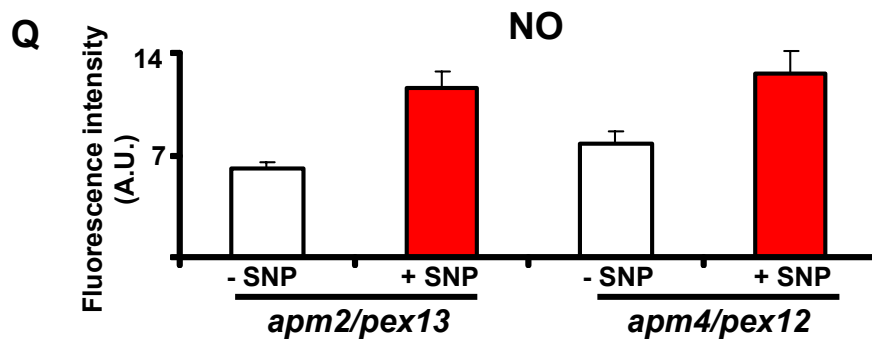

Supplemental Figure 2

**Supplemental Figure 2. Representative images illustrating the CLSM in vivo detection of NO (red colour) in the root tips of 14-day-old Arabidopsis *apm2/pex13* (panels A to H) and *apm4/pex12* (panels I to P) mutant seedlings expressing GFP-PTS1 (green colour) preincubated for 2h 30 min at 25 °C with 100 µM SNP as NO donor.** Arabidopsis *apm2/pex13* seedlings were incubated only with DAR-4M AM as a fluorescent probe for NO (panels A to D) and pre-incubated for 2h 30 min at 25 °C with 100 µM SNP as NO donor (panels E to H). Arabidopsis *apm4/pex12* seedlings were incubated only with DAR-4M AM as fluorescent probe for NO (panels I to L) and pre-incubated for 2h 30 min at 25 °C with 100 µM SNP as NO donor (panels M to P). **Panels A, E, I, and M** show peroxisome detection with green fluorescence protein (GFP, excitation 495 nm; emission 515 nm). **Panels B, F, J, and N** show NO detection (red colour) with DAR-AM AM (excitation 543 nm; emission 575 nm). **Panels C, G, K, and O** show merged images of corresponding treatments. **Panels D, H, L, and P** show the bright-field image of the corresponding samples. **Panel Q** shows the fluorescence intensity of NO (arbitrary units) from panels B, F, J, and N. Arrows indicate some representative punctuate spots corresponding to NO and peroxisome localization. Fluorescence is expressed as arbitrary units (A.U.) using Leica confocal software.
